# Supplementary material for: Pausing guides RNA folding to populate transiently stable RNA structures for riboswitch-based transcription regulation
Source: eLife journal article supplement (doi:10.7554/elife.21297), 2017-05-25
Supplement: figures [file elife-21297-figures-v2.pdf]

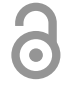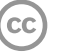

---

## Figures and figure supplements

Pausing guides RNA folding to populate transiently stable RNA structures for riboswitch-based transcription regulation

**Hannah Steinert *et al***

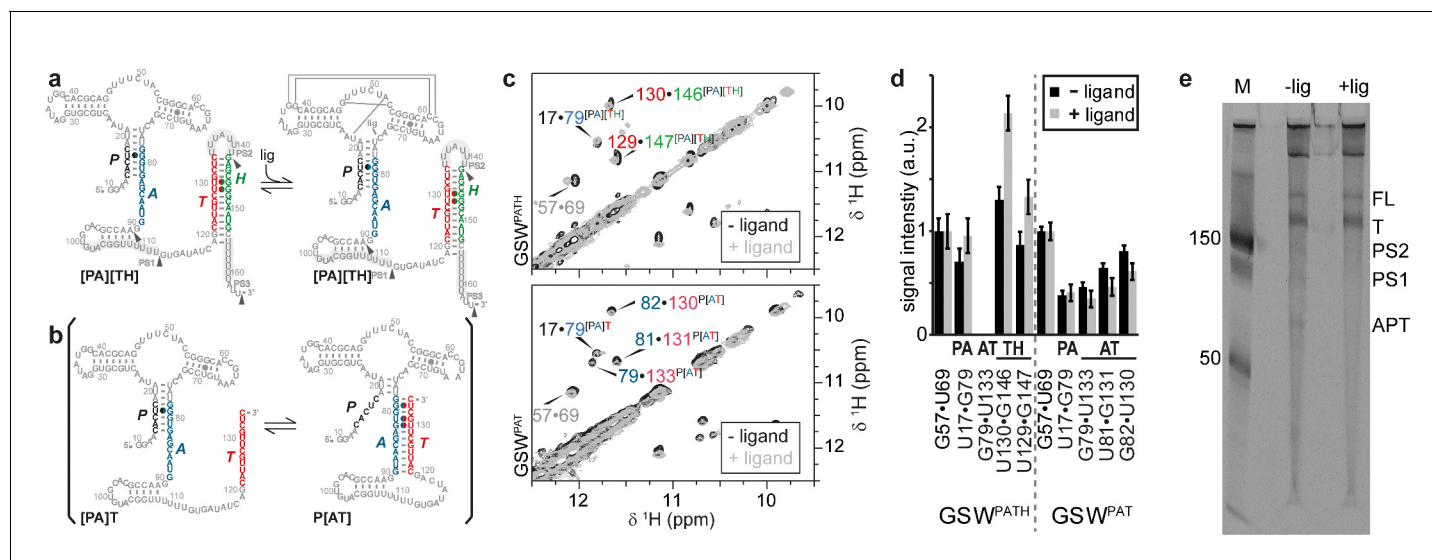

**Figure 1.** Conformational states of the guanine-sensing riboswitch depending on transcript length. (a) Secondary structure of the full-length guanine-sensing riboswitch (GSW<sup>PATH</sup>). In absence (*left*) and in presence of ligand (*right*) the aptamer closing helix (PA) and the terminator helix (TH) are formed, the anti-terminator helix (AT) is not present in either state. The only structural difference between the apo- and holo-states is the formation of a stable ligand binding pocket in the holo-state. The strands involved in the switching mechanism are colour-coded: aptamer strand (P, *black*), aptamer stabilizing strand (A, *blue*), switching strand (T, *red*), and terminator strand (H, *green*). Putative pause sites (PS1-PS3) are indicated, the sequence highlighted in grey is occupied by the polymerase (*Monforte et al., 1990*); additionally, stable structured fragments are marked by arrows; (b) Secondary structure of a truncated stably structured guanine-sensing riboswitch (GSW<sup>PAT</sup>). In the absence of ligand two conformational states are populated in a 1:1 ratio each representing a functional (on/off) state of the riboswitch, (c) G-U region of NOESY spectra of the full-length GSW<sup>PATH</sup> (*upper panel*) and the truncated riboswitch GSW<sup>PAT</sup> (*bottom*). G-U cross peaks are reporters for formation of PA (*black/blue*), P3 (*grey*), AT (*blue/red*) and TH (*red/green*), respectively; (d) signal intensities of GSW<sup>fl</sup> and GSW<sup>10-134</sup> NOESY cross peaks in absence and presence of ligand. Errors were estimated from the noise of the respective spectra. The full-length riboswitch GSW<sup>PATH</sup> adopts the terminator conformation irrespective of the ligand. The truncated GSW<sup>PAT</sup> shows a heterogeneous fold in the absence and in the presence of the ligand, (e) 10% PAGE of the overnight transcription of the full length riboswitch in the absence (-lig) and presence (+lig) of ligand. The transcribed RNA fragments correspond to the full length (FL: 228 nt), the Terminator (T: 172 nt), the second pause site (PS2: 152 nt), the first pause site (PS1: 124 nt) and the aptamer (APT: 96 nt).

DOI: [10.7554/eLife.21297.002](https://doi.org/10.7554/eLife.21297.002)

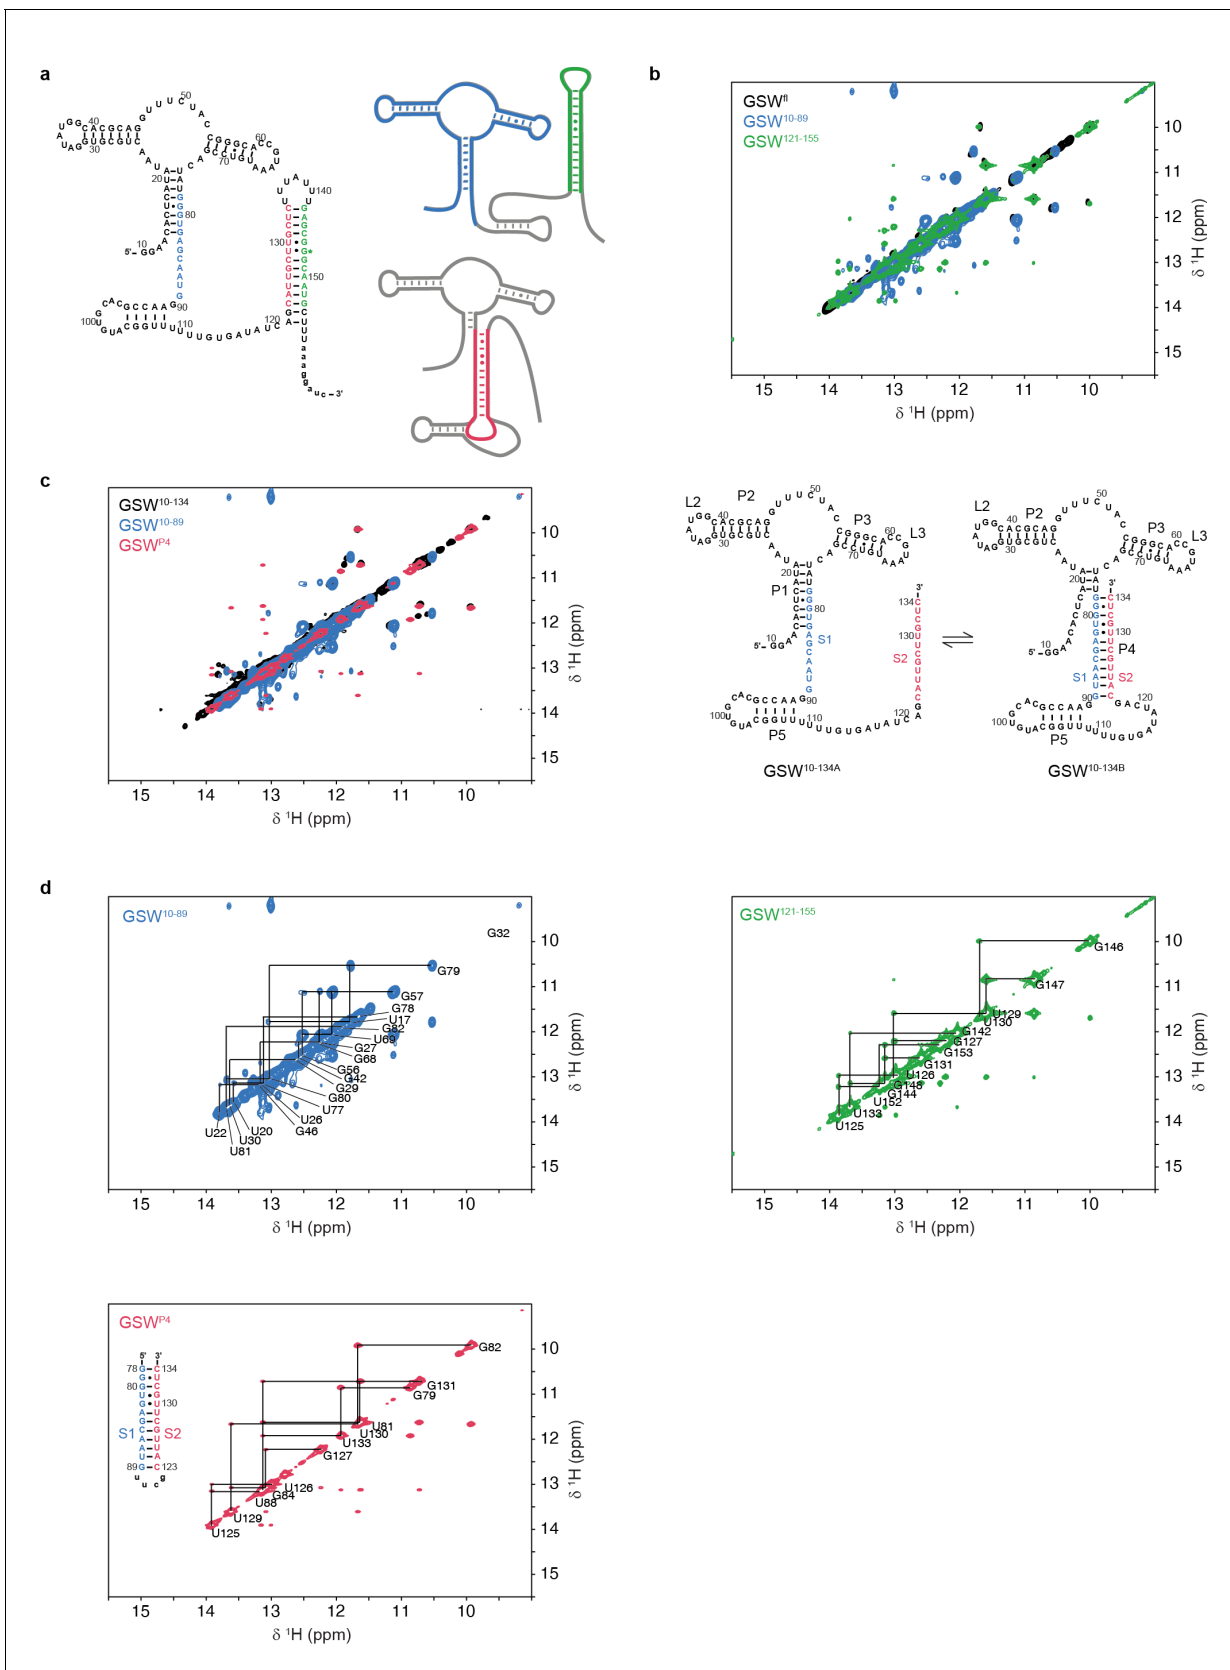

**Figure 1—figure supplement 1.** Assignment of GSW constructs. All  $^1\text{H},^1\text{H}$ -NOESY spectra were recorded at 283 K in 2 mM magnesium chloride, 50 mM potassium chloride, 25 mM potassium phosphate (pH 6.2). (a) Module design for chemical shift assignment of the full-length GSW with in the *Figure 1—figure supplement 1 continued on next page*

## Figure 1—figure supplement 1 continued

divide and conquer approach. The full-length GSW and the modules were measured by NMR spectroscopy separately. *Left*: GSW<sup>fl</sup> (GSW<sup>PATH</sup>, grey) in the terminator conformation, the aptamer domain GSW<sup>10-89</sup> (GSW<sup>PA</sup>, blue) and the terminator hairpin GSW<sup>121-155</sup> (TH, green) are indicated. *Right*: GSW<sup>fl</sup> (GSW<sup>PATH</sup>, grey) in the antiterminator conformation and the P4 module (AT, red). **(b)** Overlay of the full-length GSW<sup>fl</sup> (GSW<sup>PATH</sup>, black), the aptamer domain GSW<sup>10-89</sup> (GSW<sup>PA</sup>, blue) and the terminator hairpin GSW<sup>121-155</sup> (TH, green) shows that GSW<sup>fl</sup> (GSW<sup>PATH</sup>) adopts the terminator conformation with formed aptamer and terminator hairpin. Assignment of the fragments can be transferred to GSW<sup>fl</sup> (GSW<sup>PATH</sup>). **(c)** *Left*: Overlay of the truncated GSW<sup>10-134</sup> (GSW<sup>PAT</sup>, black), the aptamer domain GSW<sup>10-89</sup> (GSW<sup>PA</sup>, blue) and the P4 module (AT, red) reveals conformational heterogeneity of GSW<sup>10-134</sup> (GSW<sup>PAT</sup>) with either helix P1(PA) (GSW<sup>10-134A</sup>, GSW<sup>i[PA]T</sup>) or helix P4(AT) (GSW<sup>10-134B</sup>, GSW<sup>p[AT]</sup>) formed. *Right*: Conformations GSW<sup>10-134A</sup> (=GSW<sup>i[PA]T</sup>) and GSW<sup>10-134B</sup> (=GSW<sup>p[AT]</sup>) of the truncated GSW<sup>10-134</sup> (=GSW<sup>PAT</sup>). **(d)** Spectra of the aptamer domain GSW<sup>10-89</sup> (GSW<sup>PA</sup>, blue), the terminator hairpin GSW<sup>121-155</sup> (TH, green) and the P4 module (AT, red). Assignments are annotated in the spectra; the sequence of the P4 (AT) module is given.

DOI: [10.7554/eLife.21297.003](https://doi.org/10.7554/eLife.21297.003)

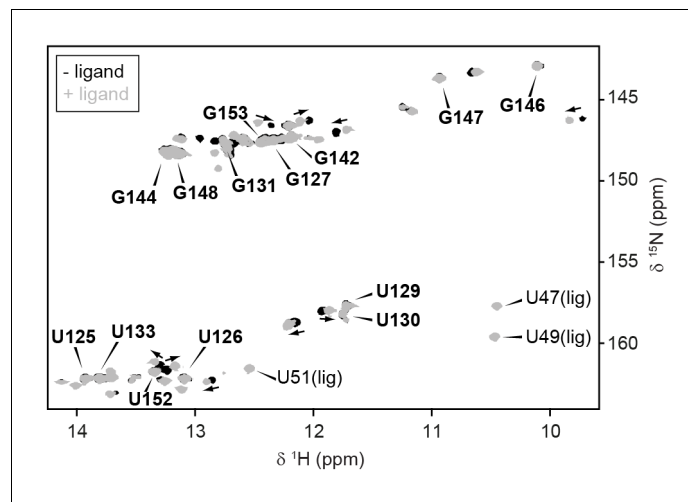

**Figure 1—figure supplement 2.** Conformation of full-length GSW. GSW<sup>fl</sup> without (*black*) and with ligand (*grey*) adopts the terminator conformation. Experimental conditions are 2 mM magnesium chloride, 50 mM potassium chloride, 25 mM potassium phosphate (pH 6.2). The resonance assignment of the terminator hairpin P6 is depicted in *bold letters*. In presence of ligand, reporter signals (U47, U49 and U51) from the binding pocket are detected. However, ligand binding induces slight chemical shift changes (*arrows*) but no conformational changes are observed in particular not for TH.

DOI: [10.7554/eLife.21297.004](https://doi.org/10.7554/eLife.21297.004)

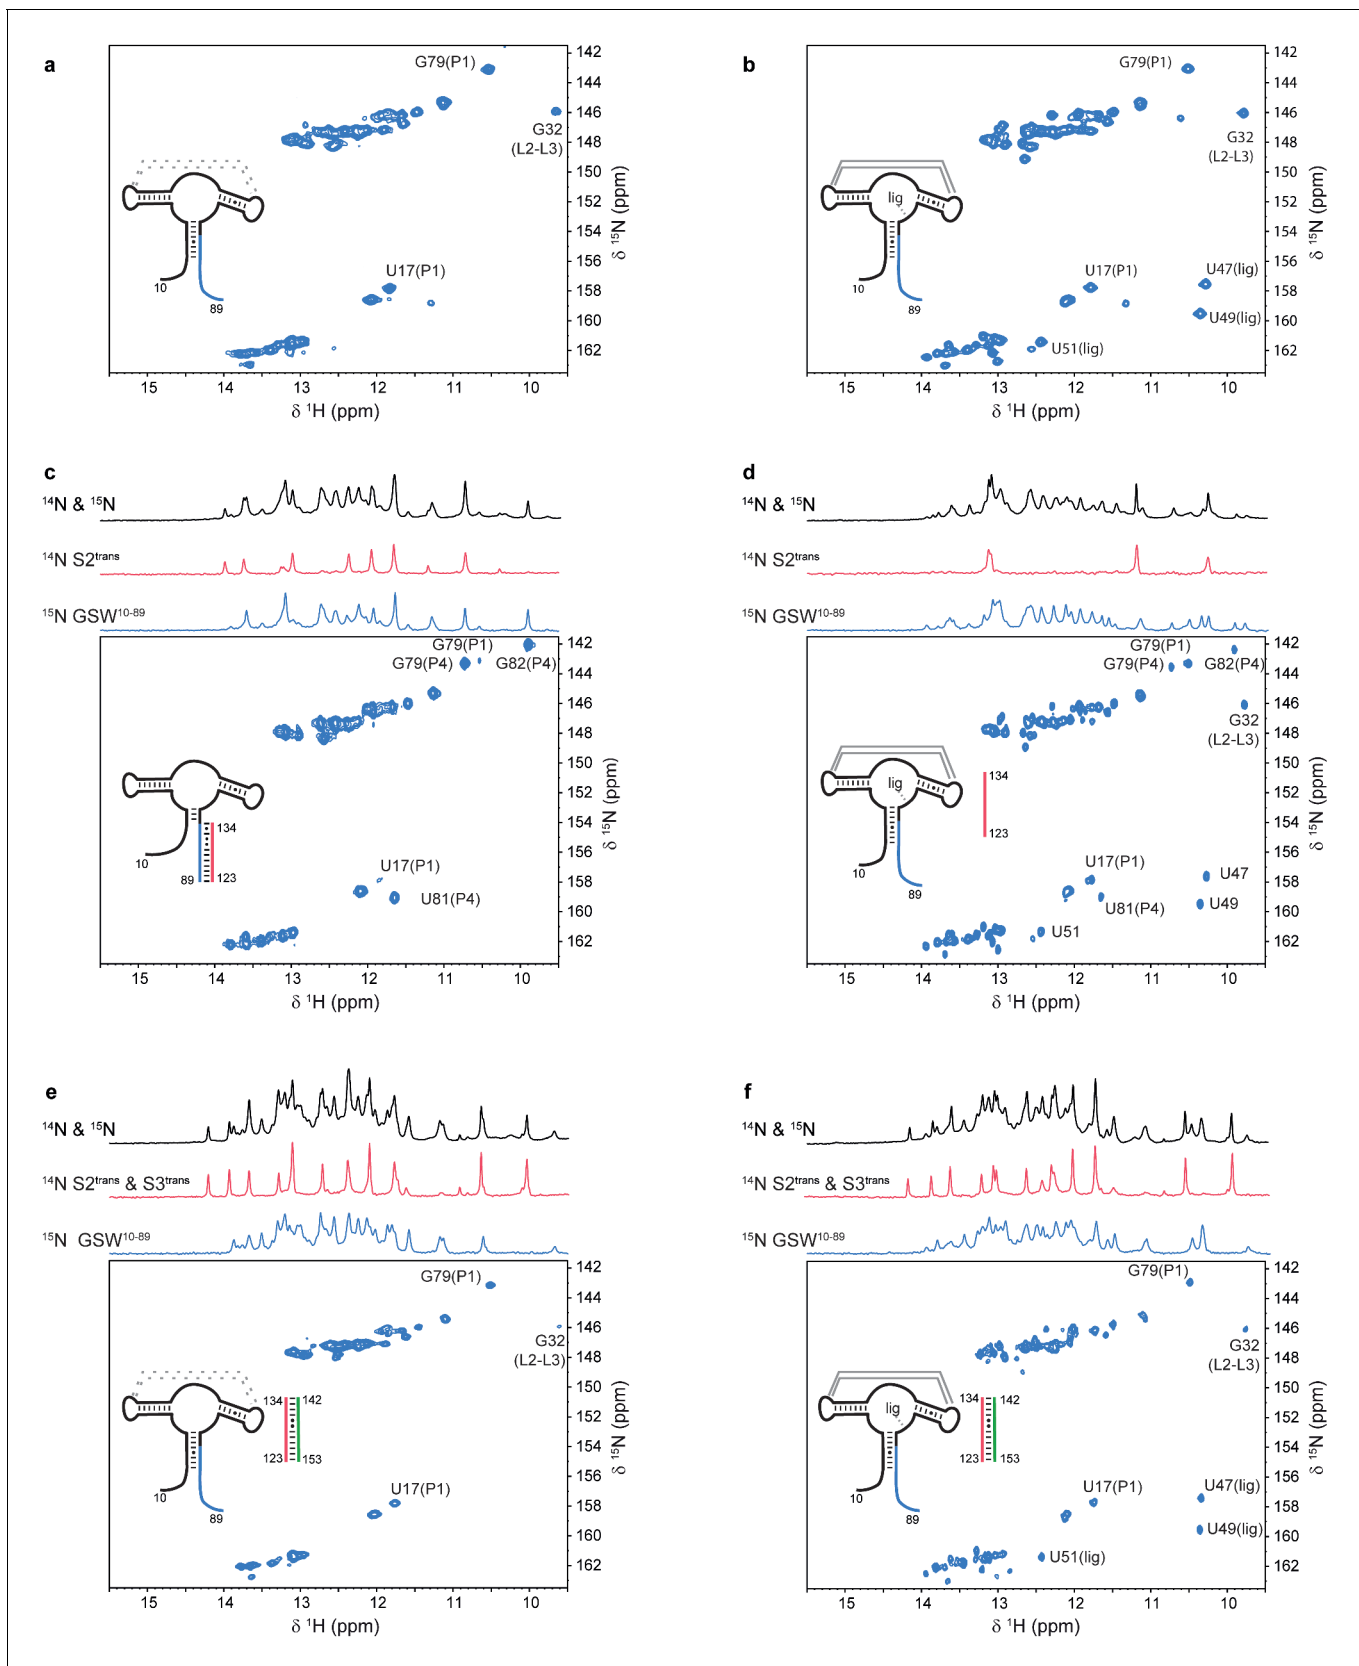

**Figure 2.** Models for intermediates during transcription. All NMR spectra were recorded at 283 K in 2 mM  $\text{MgCl}_2$ , 50 mM KCl, 25 mM potassium phosphate (pH 6.2). 1 equivalent of each RNA ( $\text{GSW}^{10-89}$  ( $=\text{GSW}^{\text{PA}}$ ),  $\text{S}2^{\text{trans}}$  ( $=\text{T}^{\text{trans}}$ ) and  $\text{S}3^{\text{trans}}$  ( $=\text{H}^{\text{trans}}$ ), respectively) was used, 4 equivalents of ligand  
 Figure 2 continued on next page

## Figure 2 continued

were added. The following selective labelling scheme was explored:  $^{15}\text{N}$ -G,U GSW $^{10-89}$ ,  $^{14}\text{N}$ -G,U S2 $^{\text{trans}}$  and  $^{14}\text{N}$ -G,U S3 $^{\text{trans}}$ . Signals originating from GSW $^{10-89}$  and S2 $^{\text{trans}}$  or S3 $^{\text{trans}}$  were separated using in x-filter 1D experiments (Weixlbaumer et al., 2013) (top). The  $^1\text{H}$ ,  $^{15}\text{N}$ -HSQC spectra (bottom) report on the interactions in the aptamer domain. (a) In the elongated aptamer domain GSW $^{10-89}$ , the helix PA was formed (U17–G79) and the loop-loop interaction reporter G32 was detected. (b) GSW $^{10-89}$  and ligand (1:4) ligand binding was monitored by appearance of signals U47, U49 and U51. (c) GSW $^{10-89}$  and S2 $^{\text{trans}}$  (1:1): Sequence S2 $^{\text{trans}}$  caused the PA reporter signals U17(P1) and G79(P1) to decrease, AT formation was followed by appearance of signals of G79(P4), U81(P4) and G82(P4). (d) GSW $^{10-89}$ , S2 $^{\text{trans}}$  and ligand (1:1:4): Addition of ligand to GSW $^{10-89}$ -S2 $^{\text{trans}}$  resulted in dissociation of the complex (decreasing signals for G79(P4), U81(P4) and G82(P4) signals) and reformation of the PA helix (U17(P1) and G79(P1) signals). Ligand binding reporters U47, U49 and U51 were detected. However, in presence of 4 equivalents of ligand, AT helix reporter signals were significant. (e) GSW $^{10-89}$ , S2 $^{\text{trans}}$  and S3 $^{\text{trans}}$  (1:1:1) Addition of S3 $^{\text{trans}}$  to GSW $^{10-89}$ -S2 $^{\text{trans}}$  resulted in complete dissociation of the complex (G79(P4), U81(P4) and G82(P4) signals) and reformation of the PA helix (U17(P1) and G79(P1) signals). In contrast to ligand addition, 1 equivalent of S3 $^{\text{trans}}$  was sufficient to disrupt the antiterminator mimic. (f) GSW $^{10-89}$ , S2 $^{\text{trans}}$ , S3 $^{\text{trans}}$  and ligand (1:1:1:4): Ligand binding to GSW $^{10-89}$  in presence of the terminator helix P6 (=TH) equals ligand binding to GSW $^{10-89}$  (GSW $^{\text{PA}}$ ) alone (b).

DOI: [10.7554/eLife.21297.005](https://doi.org/10.7554/eLife.21297.005)

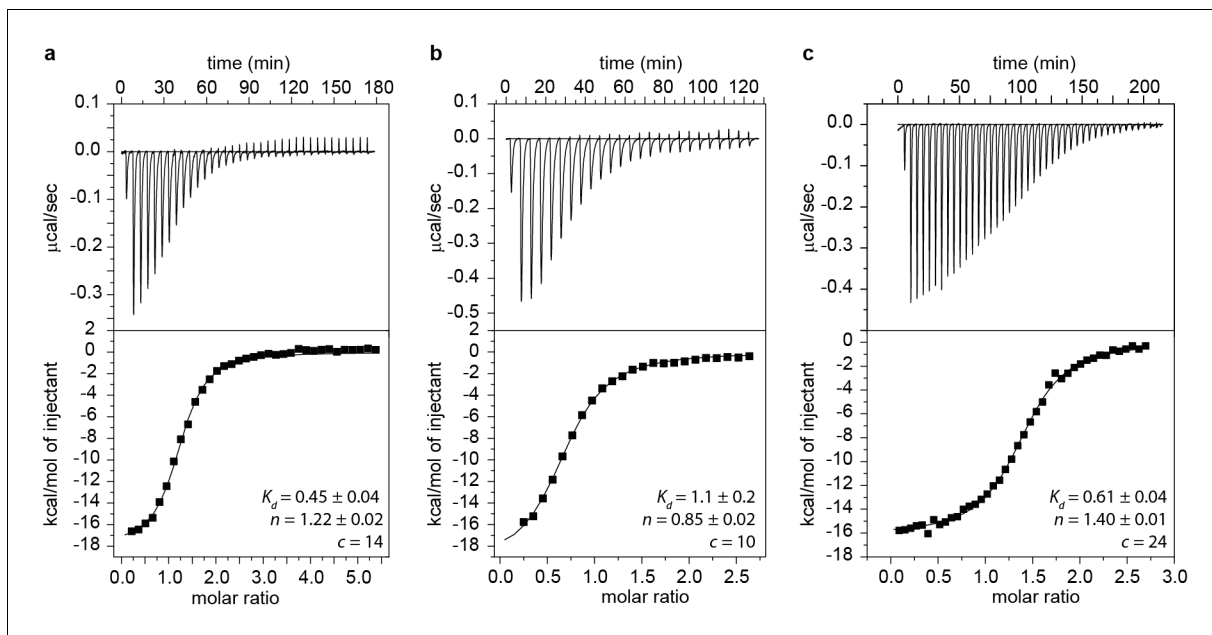

**Figure 2—figure supplement 1.** ITC measurements and  $K_d$  values of  $\text{GSW}^{\text{PA}}$  (a),  $\text{GSW}^{\text{PAT}}$  (b) and  $\text{GSW}^{\text{PATH}}$  (c). ITC measurements were performed with a Microcal VP ITC (Northampton, MA USA) at  $10^\circ\text{C}$ . A  $217 \mu\text{M}$  solution of ligand (hypoxanthine) was titrated to a  $15 \mu\text{M}$  solution of RNA using 25–42 injections. Buffer conditions were 2 mM magnesium chloride, 50 mM potassium chloride, 25 mM potassium phosphate, pH 6.2. The data was analyzed with the Origin ITC software (OriginLab, Northampton, MA USA) assuming a single binding site. The  $K_d$  values are given in  $\mu\text{M}$ . DOI: [10.7554/eLife.21297.006](https://doi.org/10.7554/eLife.21297.006)



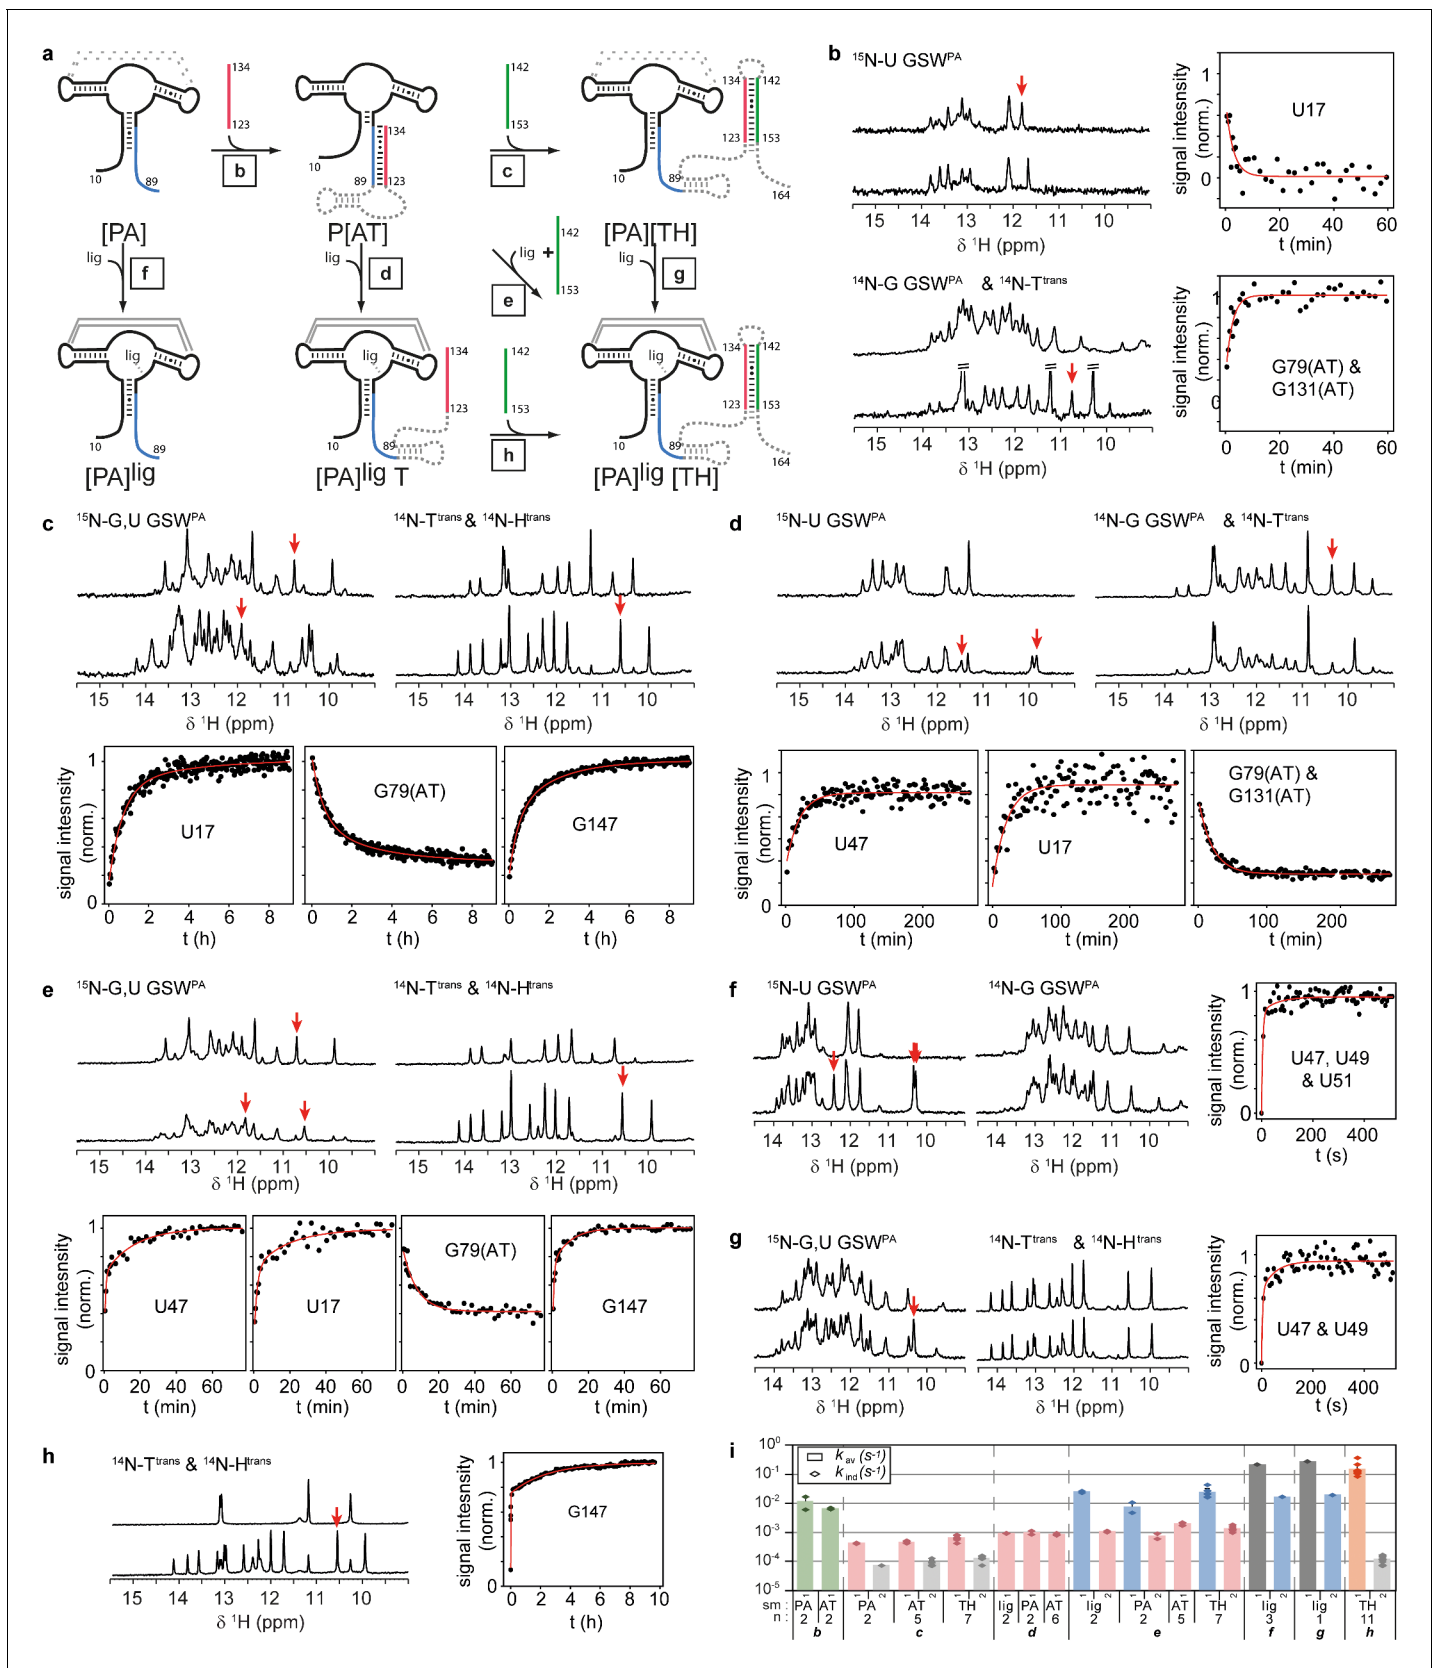

**Figure 3.** RNA refolding and ligand binding kinetics. (a) Schematic overview of the performed kinetic experiments (indicated with letters b-h) to characterise different transcription intermediates. The aptamer domain GSW<sup>PA</sup> is depicted in black, switching sequences A (blue), T (red) and H (green) *Figure 3 continued on next page*

## Figure 3 continued

are colour-coded. Dashed sequences are neglected in the antisense oligonucleotide approach. (b–h) results of the kinetic experiments, lettering according to a).  $^{15}\text{N}$ - (left) and  $^{14}\text{N}$ -filtered (right) 1D spectra before (top) and after (bottom) the kinetic experiments are depicted. An exemplary time trace reporting on the formation of each structural motif involved in the rearrangement is given, respective signals are marked with red arrows. (i) Rates obtained from signal traces of resolved imino proton resonances. Letters refer to the kinetic experiments as shown in a). For all structure motifs (ligand binding, PA, AT and TH formation, respectively) several signals (number indicated below) were analysed, averaged rates are given in bars, rates of individual base pairs are indicated with diamonds. Colour-coding refers to AT association (green), AT dissociation (red), ligand binding (dark grey), aptamer formation (blue), terminator association (orange) and  $\text{H}^{\text{trans}}$ -intrinsic unfolding (light grey) which is irrelevant for riboswitch function. Residues with a single rate were fitted mono-exponentially, a bi-exponential fit function was applied for residues with two distinguishable rates. For exact values and errors see **Supplementary file 1**.

DOI: [10.7554/eLife.21297.007](https://doi.org/10.7554/eLife.21297.007)

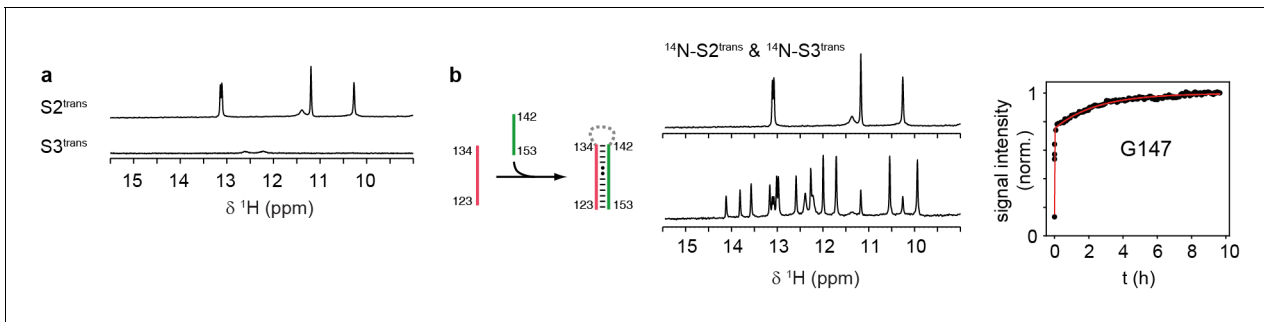

**Figure 3—figure supplement 1.** Folding of sequences  $\text{T}^{\text{trans}}$  and  $\text{H}^{\text{trans}}$ . (a) Imino proton region of the  $^1\text{H}$ -NMR spectra of the oligonucleotide sequences  $\text{T}^{\text{trans}}$  (top) and  $\text{H}^{\text{trans}}$  (bottom). NMR spectra were recorded at 283 K in 2 mM magnesium chloride, 50 mM potassium chloride, 25 mM potassium phosphate (pH 6.2). The sequence  $\text{T}^{\text{trans}}$  shows intrinsic folding, intrinsic interactions of  $\text{H}^{\text{trans}}$  are minor.

DOI: [10.7554/eLife.21297.008](https://doi.org/10.7554/eLife.21297.008)

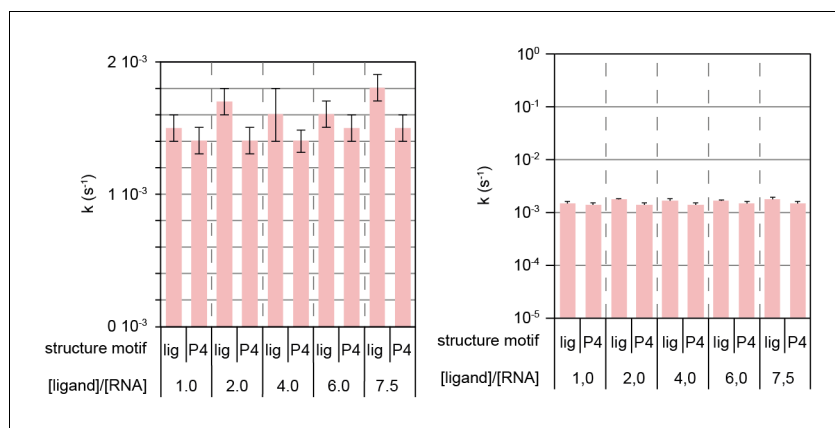

**Figure 3—figure supplement 2.** Ligand-independent dissociation of helix AT in kinetic experiment d. Rates obtained from signal traces of resolved imino proton resonances.

DOI: [10.7554/eLife.21297.009](https://doi.org/10.7554/eLife.21297.009)

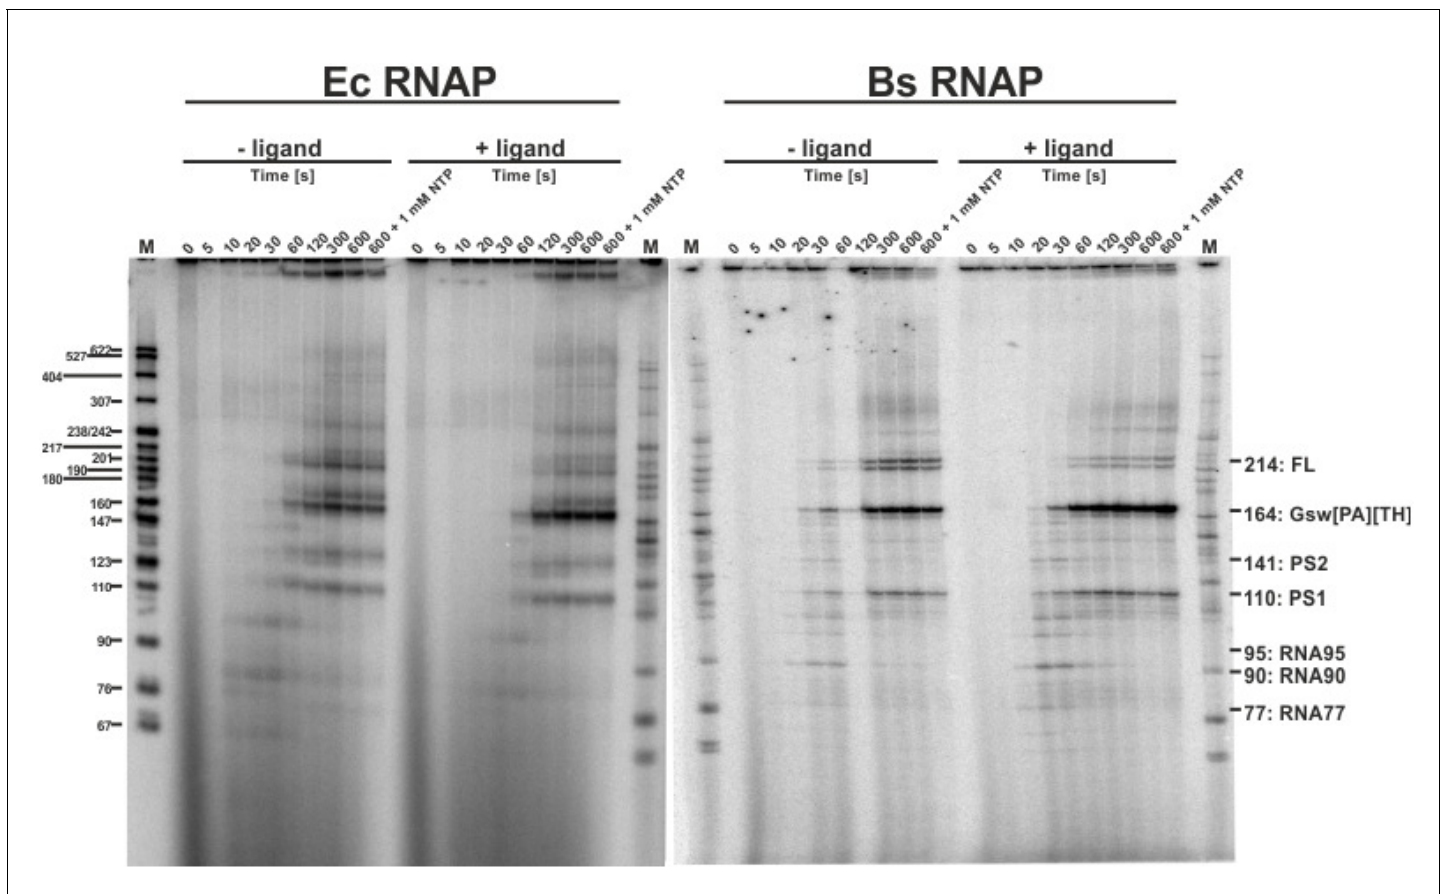

**Figure 4.** Time resolved Transcription: 8% PAGE of time resolved transcriptions using the *E. coli* (EC holo) and the *B. subtilis* (BS holo) RNAPs in the absence (-ligand) and presence (+ligand) of ligand. The time points of transcription stops are indicated in (s). The positions of  $^{32}\text{P}$  5'-labeled markers (pBR322 MspI digested) are indicated on the left hand side. Prominent paused and terminated bands are indicated on the right hand side. seven major RNA-fragments could be identified: The run-off transcript or full-length RNA (FL), the premature termination fragment (Gsw<sup>PATH</sup>), the second pause-site (PS2), the first pause-site (PS1) and three pausing fragments (RNA95 and RNA77 for *E. coli* RNAP transcriptions and RNA90 and RNA77 for *B. subtilis* RNAP transcriptions). Over time, both RNAPs transcribe the DNA-template, generating RNA-fragments of increasing size. A pausing event is characterized by signal increase and by a fast increase of the signal followed by a slower decrease (e.g. RNA77). FL and Gsw<sup>PATH</sup> show a strong accumulation over time and when ligand is added, the signal intensity of FL is decreased whereas the signal intensity of Gsw<sup>PATH</sup> is increased.  
DOI: 10.7554/eLife.21297.010

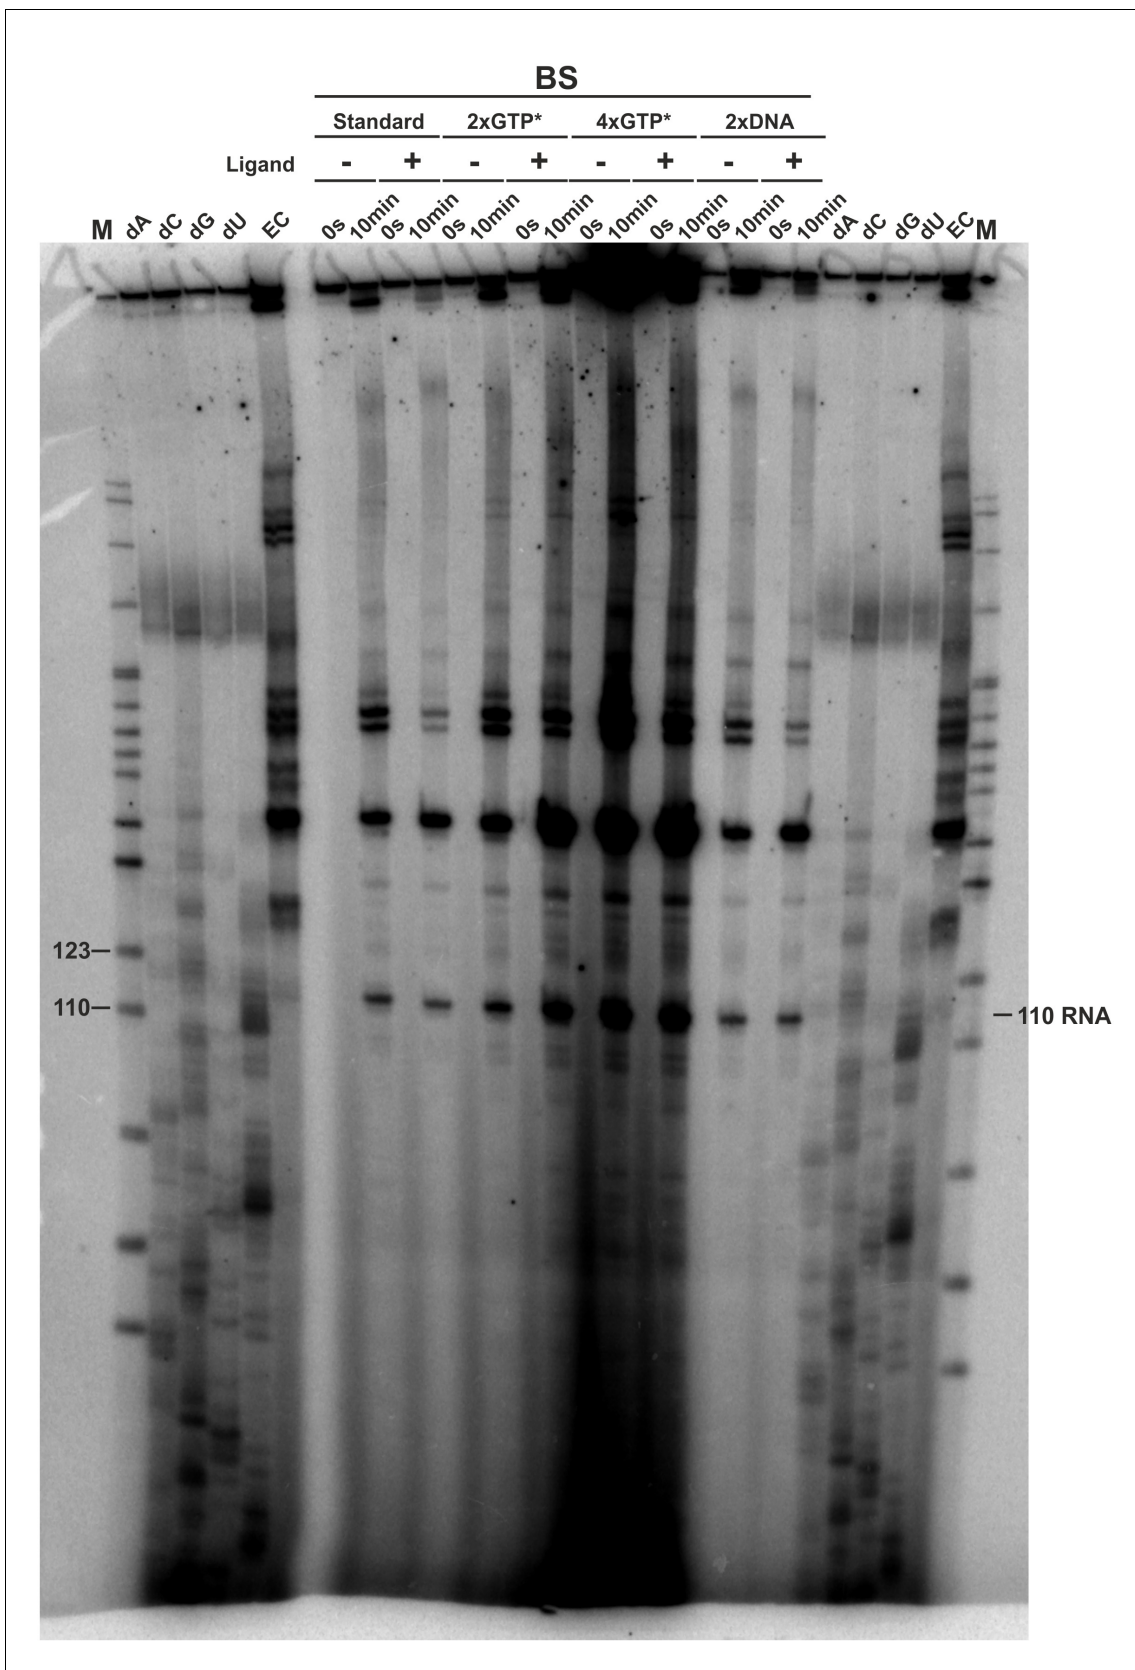

**Figure 4—figure supplement 1.** 3'-mapping and GTP\* increase. Transcription was performed using the *E. coli* RNAP in the absence (EC) and presence of 3'-deoxy ATP (dA), CTP (dC), GTP (dG) and UTP (dU), respectively and compared to transcriptions using the *B. subtilis* RNAP with different Figure 4—figure supplement 1 continued on next page

*Figure 4—figure supplement 1 continued*

amounts of radioactively labeled GTP (GTP\*) or DNA template in the absence and presence of ligand. The gel shows several transcription abortion products which end with a 3'-deoxy U and which migrate slightly faster than the 110 RNA fragment. When compared to the sequence, this poly-U stretch corresponds to the bases T107 to T112. However, it can't be clearly stated on which nucleotide the 110 RNA ends. It was therefore decided to call this fragment 110.

DOI: [10.7554/eLife.21297.011](https://doi.org/10.7554/eLife.21297.011)

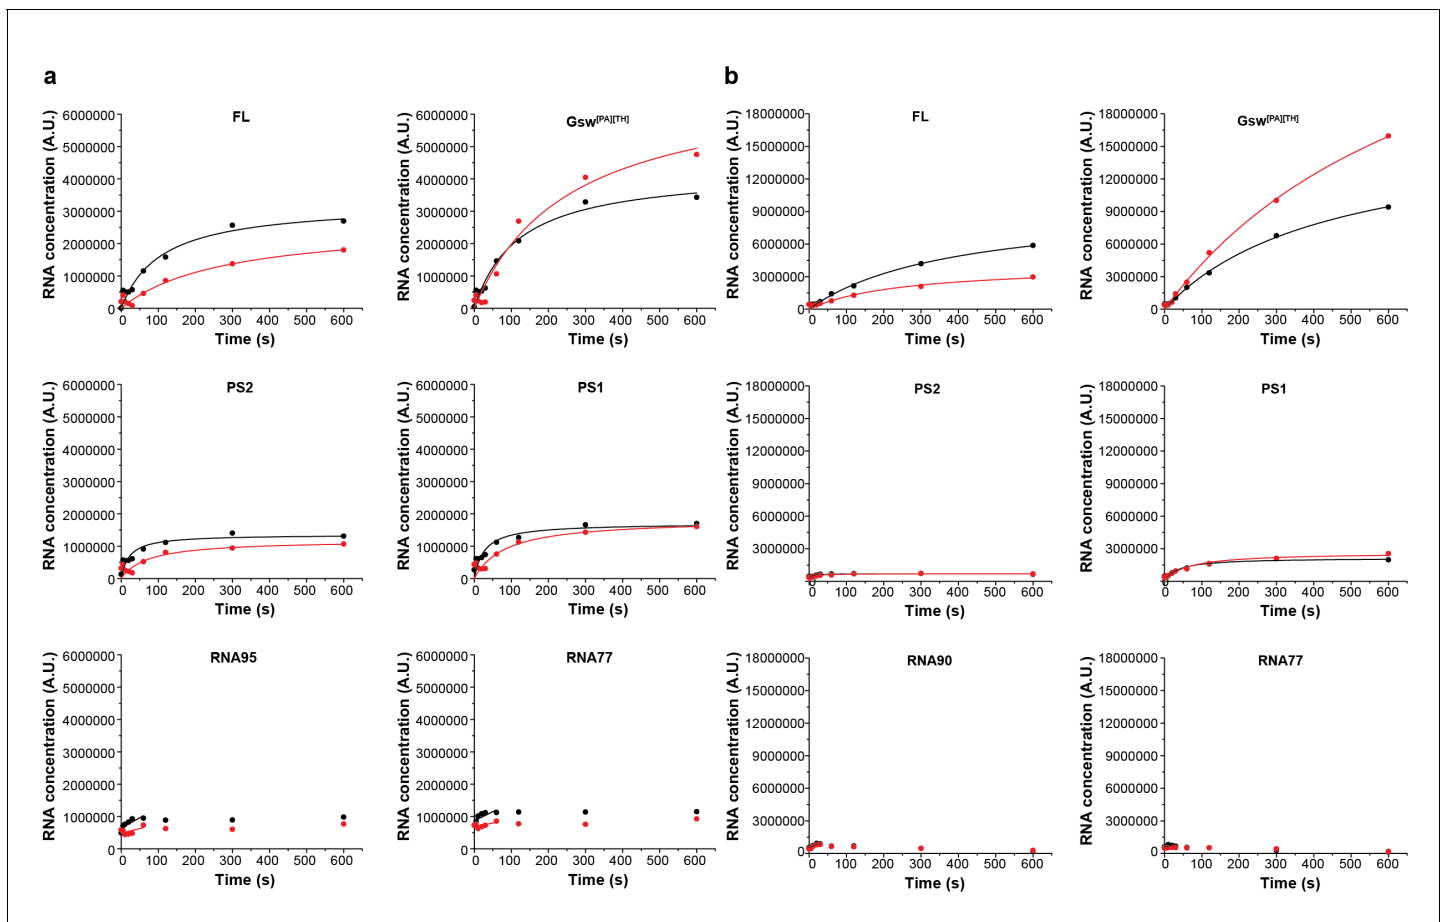

**Figure 4—figure supplement 2.** Intensity plots of the normalized pause signals. (a) The signal intensities of the *E. coli* RNAP transcripts PS2, PS2, RNA95 and RNA77 were analyzed as shown by [Landick et al. \(1996\)](#) in the absence (black) and presence (red) of ligand and plotted over time. For normalization, the intensity of an RNA signal (RNA) was divided by the sum of all RNAs of the same length and longer (RNAP). (b) Pausing plots of the *B. subtilis* RNAP transcripts. The steeper the pausing-plot, the shorter the dwell-time ( $\tau$ ) of the pause site. Pause-sites with high  $\tau$  have a higher impact on transcription kinetics. Addition of ligand seems to have a higher impact on the pausing of the *E. coli* RNAP. However, the differences of the plots are within the errors.

DOI: [10.7554/eLife.21297.012](https://doi.org/10.7554/eLife.21297.012)



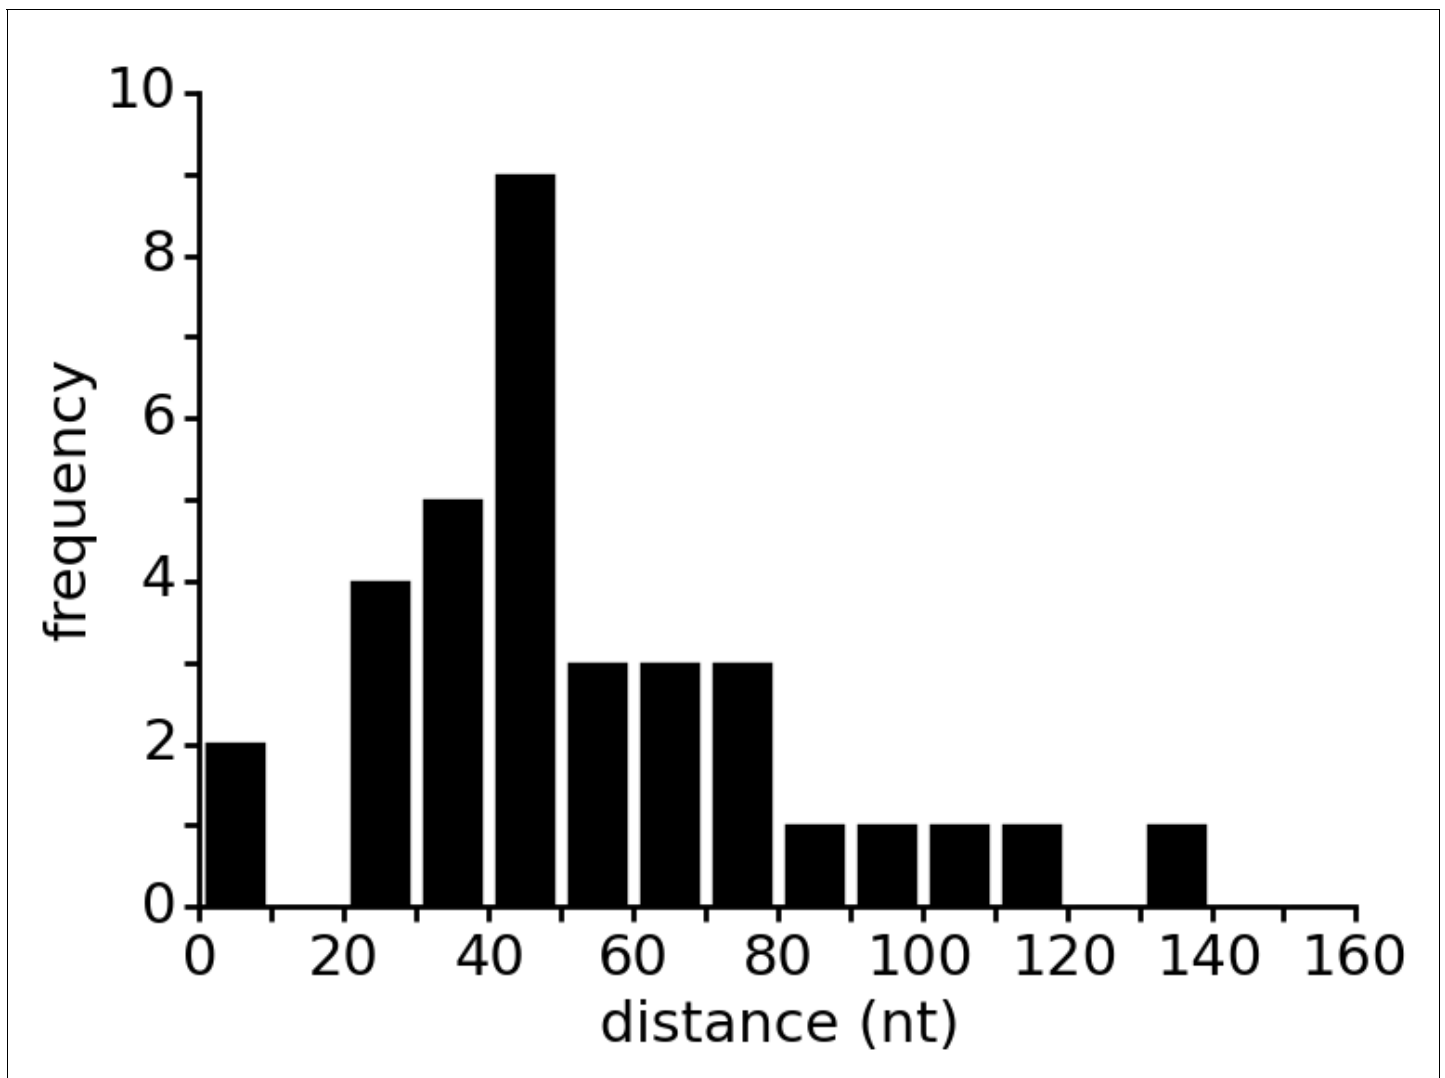

**Figure 4—figure supplement 3.** Distance between aptamer and terminator hairpin in purine riboswitches. The list of 133 riboswitches was taken from the seed dataset of the Rfam database entry for the Purine riboswitch family (RF00167). Riboswitch sequences were retrieved from the EMBL European Nucleotide Archive (ENA). The Rfam database contains only the aptamer regions of the purine riboswitches but lacks the expression platform. Therefore, the database does not annotate the terminator location. The web service ARNold, which uses Erpin ([Gautheret and Lambert, 2001](#)) and RNAmotif ([Macke et al., 2001](#)) to predict terminators, was run on all riboswitch sequences to determine the terminator position. Sequences upstream of the coding sequence (CDS) as identified by annotations in ENA were used as input for ARNold. ARNold identified terminators between the aptamer and the CDS in 35 of the 133 sequences. The distances between aptamer and terminator were calculated based on the secondary structure annotation from Rfam and the output from ARNold. Predicted terminators inside the aptamer sequence were excluded from the data.

DOI: [10.7554/eLife.21297.013](https://doi.org/10.7554/eLife.21297.013)



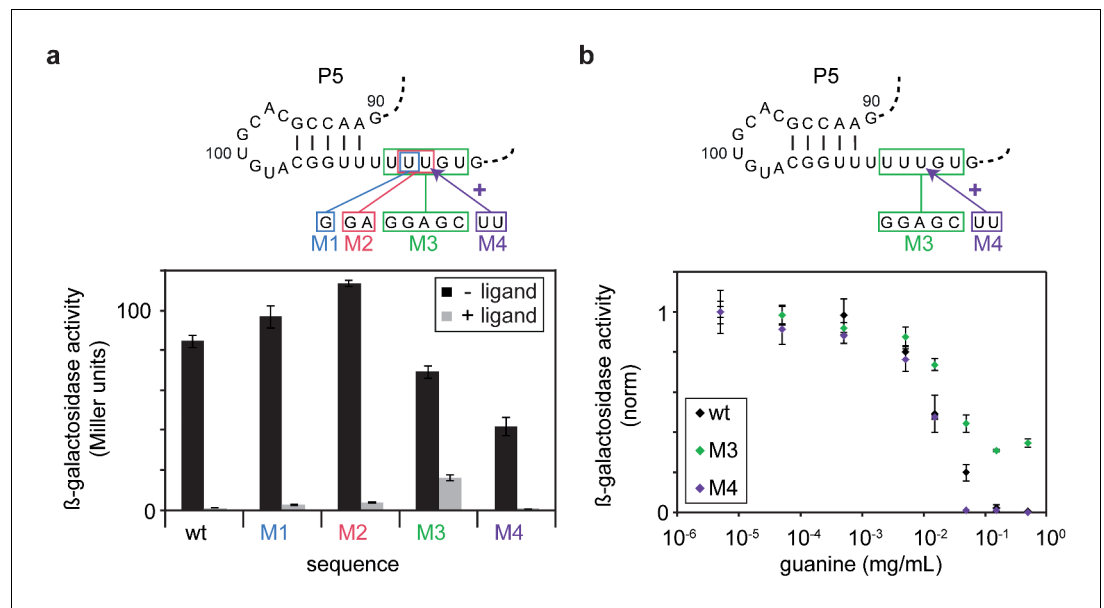

**Figure 6.** In vivo Pause site characterisation. (a) Regulation of  $\beta$ -galactosidase reporter gene expression by wt-GSW and pause site 1 mutants. Nucleotide exchanges or insertion of residues to generate the PS1 mutants M1–M4 are indicated. Enzyme activity for cells grown in absence (*black bars*) or presence of  $0.5 \text{ mg mL}^{-1}$  guanine (*grey bars*), respectively; the dynamic range corresponds to the ratio of enzyme activity in absence and presence of ligand. (b) Dose-dependent repression of  $\beta$ -galactosidase expression for wt GSW (*black*), M3 (*green*) and M4 (*purple*). Nucleotide exchanges to generate the PS1 mutants M3 and M4 are indicated. Cultures were grown with increasing concentrations of guanine. Deletion of PS1 reduces riboswitch efficiency, whereas it is increased in case of elongation of PS1. However, both mutations do not significantly alter the half maximal effective concentration EC50.

DOI: 10.7554/eLife.21297.015
